# Supplementary material for: APP Knock-In Mice Produce E22P-Aβ Exhibiting an Alzheimer’s Disease-like Phenotype with Dysregulation of Hypoxia-Inducible Factor Expression
Source: MDPI journal article supplement (doi:10.3390/ijms232113259), 2022-10-31
Supplement: s1 [file s1]

## Supplementary Material

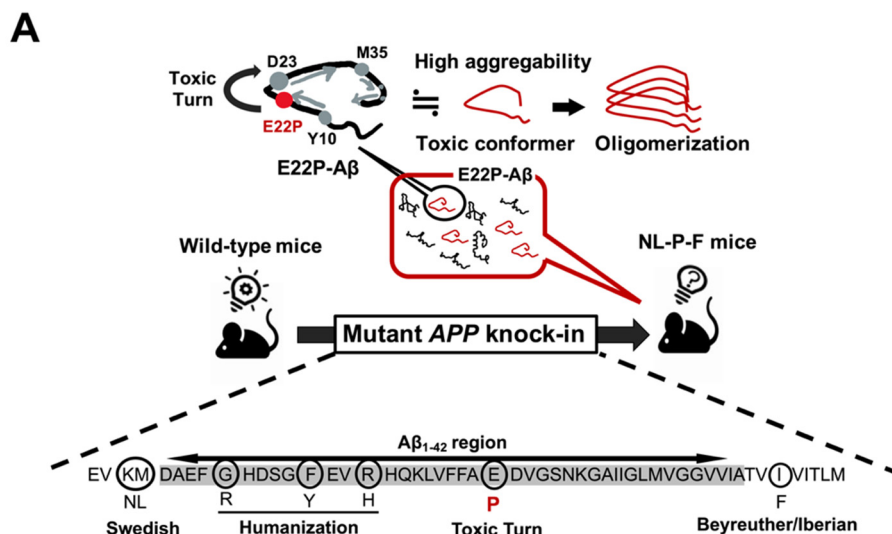

**Figure S1.** To construct the APP knock-in mice, the sequence for Aβ and the surrounding mutation sites related to gene mutation of familial AD were substituted. Swedish double mutations (K670N substitution and M671L substitution), Beyreuther/Iberian (I716F substitution) and Toxic Turn (E693P substitution) mutations were introduced. Furthermore, the Aβ sequence was humanized by introducing mutations leading to the substitutions G676R, F681Y, and R684H. E22P-Aβ has an intramolecular turn at positions 22–23, forming a toxic conformer. Toxic conformers are highly aggregative and promote Aβ oligomerization. Under physiological conditions, *APP<sup>NL-P-F/NL-P-F</sup>* (NL-P-F) mice exhibit phenotypes characterized by toxic conformers with production of E22P-Aβ. (A) NL-P-F mice are generated by knock-in technique of the mutant *APP* gene and produce Aβ oligomers by toxic conformers.

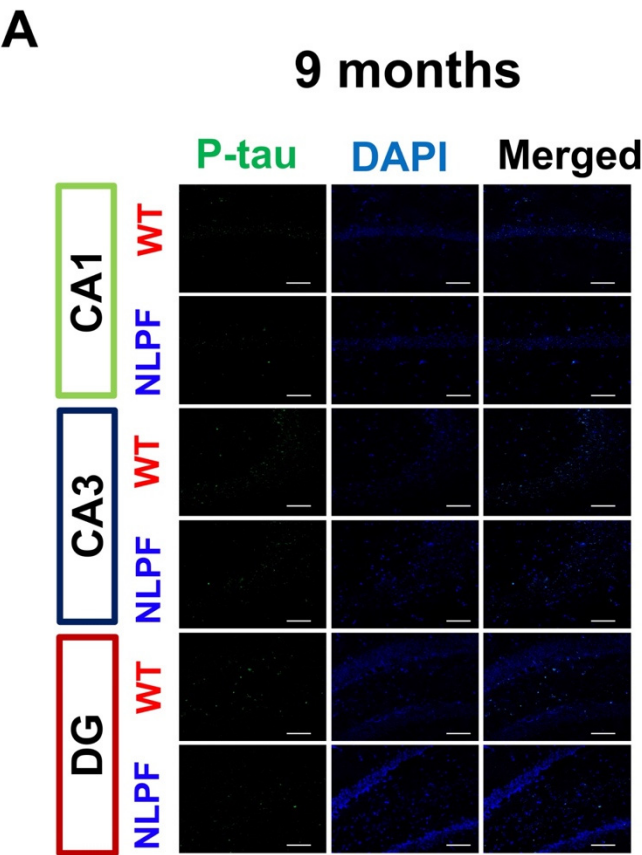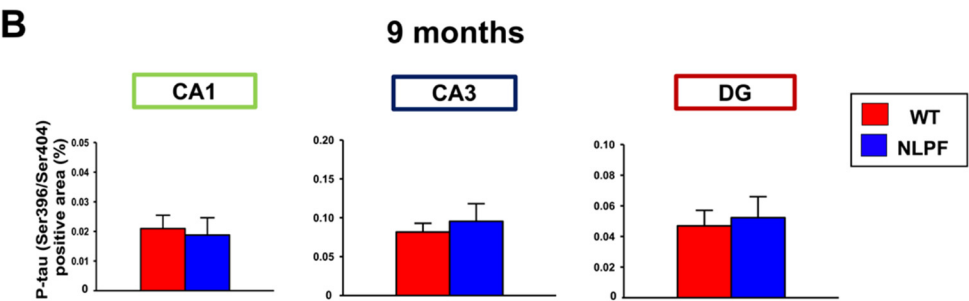

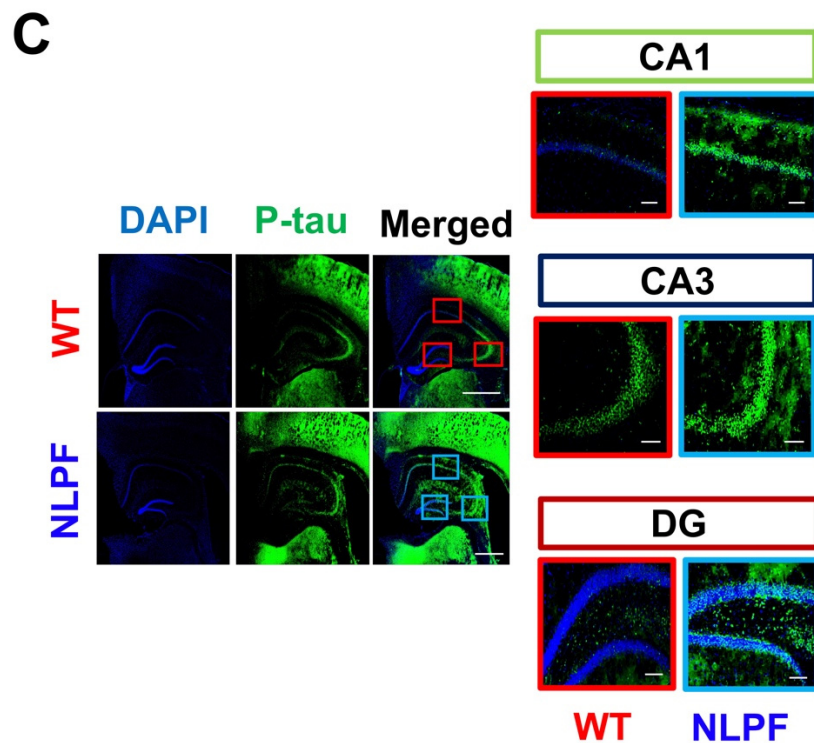

**Figure S2.** The phosphorylated tau-positive area in the hippocampal CA1, CA3, and DG (A–B) at nine months and (C) twelve months in wild-type (WT) and NL-P-F (NLPF) mice. (A) Representative confocal images. Scale bar indicates 50  $\mu$ m. (B) The phosphorylated tau-positive area (% of total area). (C) Representative fluorescent images. The scale bar indicates 1 mm (50  $\mu$ m in enlarged images) WT and NLPF ( $n = 6$ ). Values indicate the mean  $\pm$  SEM.

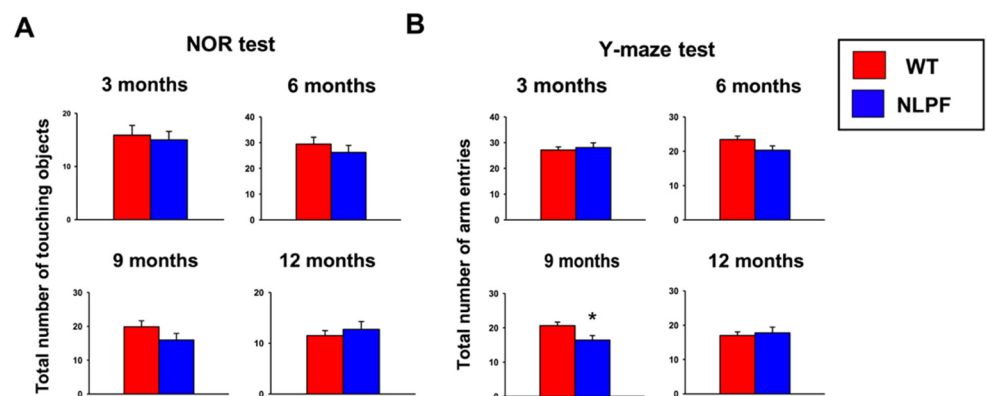

**Figure S3.** From three to twelve months, the total number of touches in the NOR test and entries in the Y-maze test were almost the same. (A) Total number of times mice touched familiar and novel objects in the NOR test. (B) Total number of times mice entered each arm in the Y-maze test. Values indicate the mean  $\pm$  SEM. \* $P < 0.05$ , compared with age-matched WT, two-way ANOVA post hoc Holm-sidak Tukey's test.

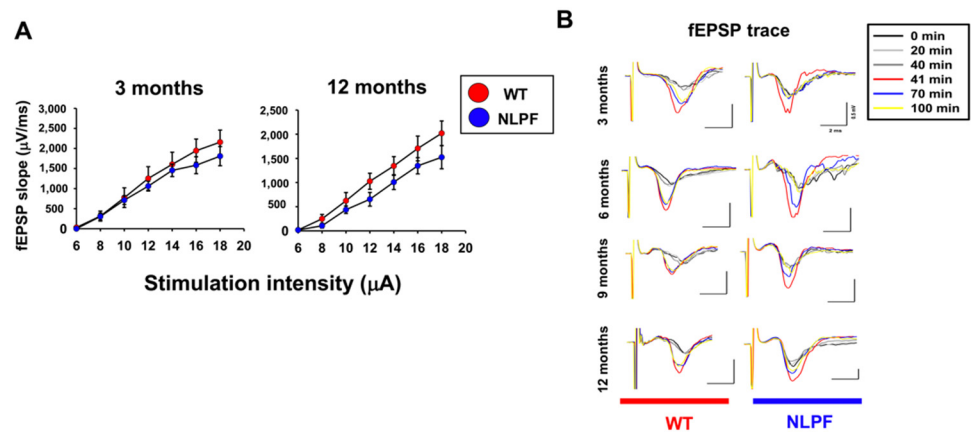

**Figure S4.** From three to twelve months, Input-output curves were measured at hippocampal CA1 synapses and representative fEPSP trace of LTP measurement are shown. (A) Input-Output curve. WT and NLPF ( $n = 9$ ) at three months, WT ( $n = 11$ ) and NLPF ( $n = 10$ ) at twelve months. (B) Representative fEPSP traces of LTP measurement (black: 0 min, gray: 20 min, dark gray: 40 min, red: 41 min, blue: 70 min, and yellow: 100 min). Values indicate the mean  $\pm$  SEM.

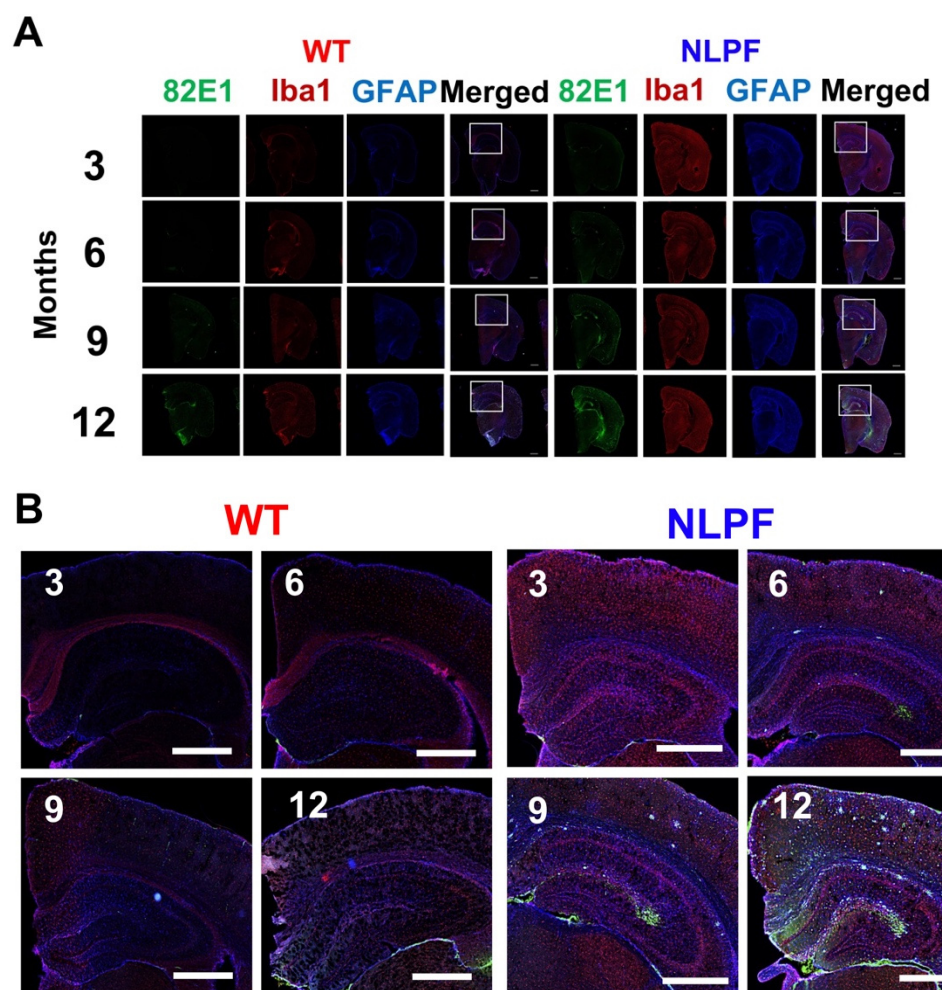

**Figure S5.** Triple stained images of coronal brain sections including the hippocampal region. Increased Iba1 and GFAP fluorescence was detected in NL-P-F mice from three to twelve months. (A) A $\beta$  deposition and glial cell activation in NL-P-F mice. Microglia and astrocytes were immunostained with antibodies for Iba1 and GFAP, respectively. A $\beta$  deposition was detected by

82E1. (B) Enlarged images of the square surrounded by the white line in (A). Scale bar indicates 1 mm.

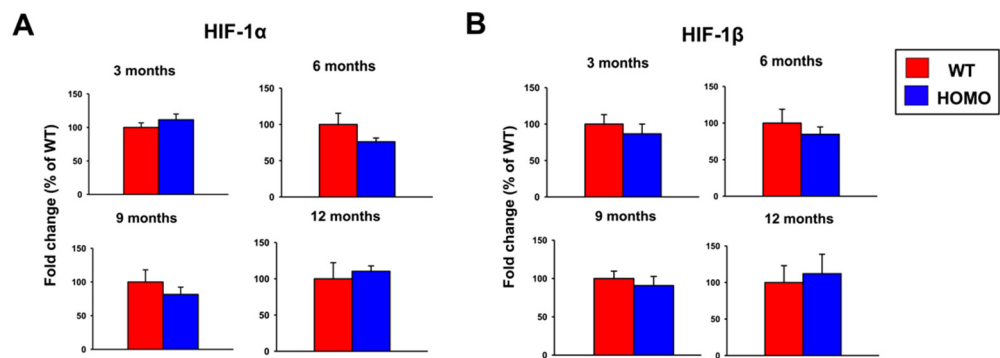

**Figure S6.** Relative gene expression levels of (A) HIF-1 $\alpha$  and (B) HIF-1 $\beta$  of hippocampal tissue of NL-P-F mice from three to twelve months. Gene expression levels were not significantly different between wild-type and NL-P-F mice. (A) WT ( $n = 5-6$ ), NLPF ( $n = 6$ ). (B) WT ( $n = 5-6$ ), NLPF ( $n = 6$ ). Values indicate the mean  $\pm$  SEM.

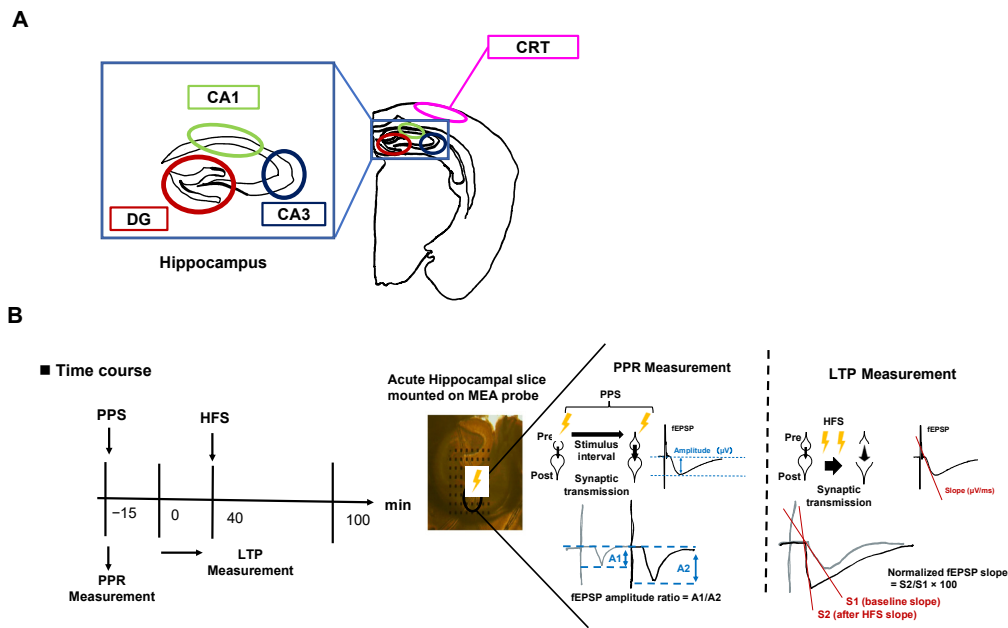

**Figure S7.** (A) Staining area of coronal sections of brain hemisphere were shown. Hippocampal CA1, CA3, DG, and cortex (CRT) were analyzed by Immunohistochemistry. (B) Time course and method to calculate PPR and LTP of the electrophysiological recording.

**Table S1.** Detailed information on statistical analysis.

| Fig. | F value                                                                                      | P-value                                                                                                                                                          | Statistical method                           |
|------|----------------------------------------------------------------------------------------------|------------------------------------------------------------------------------------------------------------------------------------------------------------------|----------------------------------------------|
| 1A   | Genotype: (1, 29) = 216.755<br>Month: (3, 29) = 30.330<br>Genotype x Month: (3, 29) = 30.469 | Genotype: < 0.001<br>Month: < 0.001<br>Genotype x Month: < 0.001<br>NLPF vs. WT<br>3 months: 0.004<br>6 months: 0.002<br>9 months: < 0.001<br>12 months: < 0.001 | 2 way ANOVA post hoc holm-sidak Tukey's test |
| 1B   | Genotype: (1, 28) = 38.430                                                                   | Genotype: < 0.001                                                                                                                                                | 2 way ANOVA post hoc holm-sidak Tukey's test |

|        |                                                                                             |                                                                                                                                                                    |                                              |
|--------|---------------------------------------------------------------------------------------------|--------------------------------------------------------------------------------------------------------------------------------------------------------------------|----------------------------------------------|
|        | Month: (3, 28) = 13.397<br>Genotype x Month: (3, 28) = 13.395                               | Month: < 0.001<br>Genotype x Month: < 0.001<br>3 months: 0.932<br>6 months: 0.661<br>9 months: < 0.001<br>12 months: < 0.001                                       |                                              |
| 2B-CA1 | Genotype: (1, 48) = 37.473<br>Month: (3, 48) = 18.341<br>Genotype x Month: (1, 48) = 18.378 | Genotype: < 0.001<br>Month: < 0.001<br>Genotype x Month: < 0.001<br>NLPF vs. WT<br>3 months: 0.982<br>6 months: 0.647<br>9 months: 0.014<br>12 months: < 0.001     | 2 way ANOVA post hoc holm-sidak Tukey's test |
| 2B-DG  | Genotype: (1, 48) = 46.633<br>Month: (3, 48) = 22.669<br>Genotype x Month: (3, 48) = 22.843 | Genotype: < 0.001<br>Month: < 0.001<br>Genotype x Month: < 0.001<br>NLPF vs. WT<br>3 months: 0.973<br>6 months: 0.534<br>9 months: 0.009<br>12 months: < 0.001     | 2 way ANOVA post hoc holm-sidak Tukey's test |
| 2B-CRT | Genotype: (1, 48) = 27.959<br>Month: (3, 48) = 8.718<br>Genotype x Month: (3, 48) = 8.243   | Genotype: < 0.001<br>Month: < 0.001<br>Genotype x Month: < 0.001<br>NLPF vs. WT<br>3 months: 0.999<br>6 months: 0.460<br>9 months: < 0.001<br>12 months: < 0.001   | 2 way ANOVA post hoc holm-sidak Tukey's test |
| 2E     |                                                                                             | CA1: 0.015<br>CA3: 0.002<br>DG: 0.002                                                                                                                              | Mann-Whitney rank sum test                   |
| 2H     |                                                                                             | CA1: 0.835<br>CA3: 0.615                                                                                                                                           | Mann-Whitney rank sum test                   |
| 3B     | Genotype: (1, 98) = 120.307<br>Month: (3, 98) = 8.682<br>Genotype x Month: (3, 98) = 6.288  | Genotype: < 0.001<br>Month: < 0.001<br>Genotype x Month: < 0.001<br>NLPF vs. WT<br>3 months: 0.195<br>6 months: < 0.001<br>9 months: < 0.001<br>12 months: < 0.001 | 2 way ANOVA post hoc holm-sidak Tukey's test |
| 3C     | Genotype: (1, 98) = 61.971<br>Month: (3, 98) = 2.461<br>Genotype x Month: (3, 98) =         | Genotype: < 0.001<br>Month: 0.067<br>Genotype x Month:                                                                                                             | 2 way ANOVA post hoc Holm-sidak Tukey's test |

|              |                                                                                           |                                                                                                                                                                               |                                              |
|--------------|-------------------------------------------------------------------------------------------|-------------------------------------------------------------------------------------------------------------------------------------------------------------------------------|----------------------------------------------|
|              | 2.210                                                                                     | 0.092<br>NLPF vs. WT<br>3 months: 0.130<br>6 months: < 0.001<br>9 months: < 0.001<br>12 months: < 0.001                                                                       |                                              |
| 4A-3 months  |                                                                                           | 25 ms: 0.319<br>50 ms: 0.610<br>100 ms: 0.584<br>200 ms: 0.537                                                                                                                | Student's t-test                             |
| 4A-6 months  |                                                                                           | 25 ms: 0.440<br>50 ms: 0.195<br>100 ms: 0.689<br>200 ms: 0.482                                                                                                                | Student's t-test                             |
| 4A-9 months  |                                                                                           | 25 ms: 0.355<br>50 ms: 0.226<br>100 ms: 0.306<br>200 ms: 0.820                                                                                                                | Student's t-test                             |
| 4A-12 months |                                                                                           | 25 ms: 0.630<br>50 ms: 0.856<br>100 ms: 0.645<br>200 ms: 0.862                                                                                                                | Student's t-test                             |
| 4C           | Genotype: (1, 63) = 20.639<br>Month: (1, 63) = 1.381<br>Genotype x Month: (1, 63) = 0.378 | Genotype: < 0.001<br>Month: 0.257<br>Genotype x Month: 0.769<br>NLPF vs. WT<br>1.5 months: 0.901<br>3 months: 0.028<br>6 months: 0.003<br>9 months: 0.161<br>12 months: 0.020 | 2 way ANOVA post hoc holm-sidak Tukey's test |
| 5B-CA1       | Genotype: (1, 48) = 43.228<br>Month: (3, 48) = 0.356<br>Genotype x Month: (3, 48) = 0.918 | Genotype: < 0.001<br>Month: 0.785<br>Genotype x Month: 0.440<br>NLPF vs. WT<br>3 months: < 0.001<br>6 months: 0.079<br>9 months: < 0.001<br>12 months: < 0.001                | 2 way ANOVA post hoc holm-sidak Tukey's test |
| 5B-DG        | Genotype: (1, 47) = 24.976<br>Month: (3, 47) = 0.374<br>Genotype x Month: (3, 47) = 0.227 | Genotype: < 0.001<br>Month: 0.772<br>Genotype x Month: 0.877<br>NLPF vs. WT<br>3 months: 0.003<br>6 months: 0.044<br>9 months: 0.034<br>12 months: 0.014                      | 2 way ANOVA post hoc holm-sidak Tukey's test |
| 5B-CRT       | Genotype: (1, 48) = 40.545                                                                | Genotype: < 0.001                                                                                                                                                             | 2 way ANOVA post hoc holm-sidak Tukey's test |

|        |                                                                                           |                                                                                                                                                            |                                                                                                                                           |
|--------|-------------------------------------------------------------------------------------------|------------------------------------------------------------------------------------------------------------------------------------------------------------|-------------------------------------------------------------------------------------------------------------------------------------------|
|        | Month: (3, 48) = 0.330<br>Genotype x Month: (3, 48) = 0.264                               | Month: 0.804<br>Genotype x Month: 0.851<br>NLPF vs. WT<br>3 months: 0.001<br>6 months: 0.022<br>9 months: 0.002<br>12 months: 0.001                        |                                                                                                                                           |
| 5C-CA1 | Genotype: (1, 48) = 25.489<br>Month: (3, 48) = 0.406<br>Genotype x Month: (3, 48) = 0.327 | Genotype: < 0.001<br>Month: 0.749<br>Genotype x Month: 0.806<br>NLPF vs. WT<br>3 months: 0.029<br>6 months: 0.019<br>9 months: 0.001<br>12 months: 0.048   | 2 way ANOVA post hoc holm-sidak Tukey's test                                                                                              |
| 5C-DG  | Genotype: (1, 47) = 16.071<br>Month: (3, 47) = 0.531<br>Genotype x Month: (3, 47) = 0.989 | Genotype: < 0.001<br>Month: 0.664<br>Genotype x Month: 0.406<br>NLPF vs. WT<br>3 months: 0.022<br>6 months: 0.062<br>9 months: 0.003<br>12 months: 0.499   | 2 way ANOVA post hoc holm-sidak Tukey's test                                                                                              |
| 5C-CRT | Genotype: (1, 48) = 27.778<br>Month: (3, 48) = 0.542<br>Genotype x Month: (3, 48) = 1.599 | Genotype: < 0.001<br>Month: 0.656<br>Genotype x Month: 0.202<br>NLPF vs. WT<br>3 months: 0.241<br>6 months: 0.049<br>9 months: < 0.001<br>12 months: 0.002 | 2 way ANOVA post hoc holm-sidak Tukey's test                                                                                              |
| 6A     |                                                                                           | 3 months: 0.925<br>6 months: 0.029<br>9 months: 0.486<br>12 months: 0.340                                                                                  | 3 months: Student's t-test<br>6 months: Mann-Whitney rank sum test<br>9 months: Mann-Whitney rank sum test<br>12 months: Student's t-test |
| 6B     |                                                                                           | 3 months: 0.593<br>6 months: 0.026<br>9 months: 0.025<br>12 months: 0.792                                                                                  | 3 months: Student's t-test<br>6 months: Mann-Whitney rank sum test<br>9 months: Student's t-test<br>12 months: Mann-Whitney rank sum test |
